# Supplementary material for: Unsurpassed cage effect for the photolysis of dibenzyl ketones in water-soluble dendrimers
Source: Royal Society of Chemistry journal article supplement (doi:10.1039/c1ob05244f), 2011-01-01
Supplement: c1ob05244f.pdf [file c1ob05244f.pdf]

## Supplementary Material

### Unsurpassed cage effect for the photolysis of dibenzyl ketones in water-soluble dendrimers

Zhao Yuan, Jinping Chen\*, Yi Zeng, Ying-Ying Li, Yongbin Han and Yi Li\*

*Key Laboratory of Photochemical Conversion and Optoelectronic Materials,  
Technical Institute of Physics and Chemistry, Chinese Academy of Sciences, Beijing  
100190, P. R. China.*

*E-mail: [yili@mail.ipc.ac.cn](mailto:yili@mail.ipc.ac.cn), [chenjp@mail.ipc.ac.cn](mailto:chenjp@mail.ipc.ac.cn).*

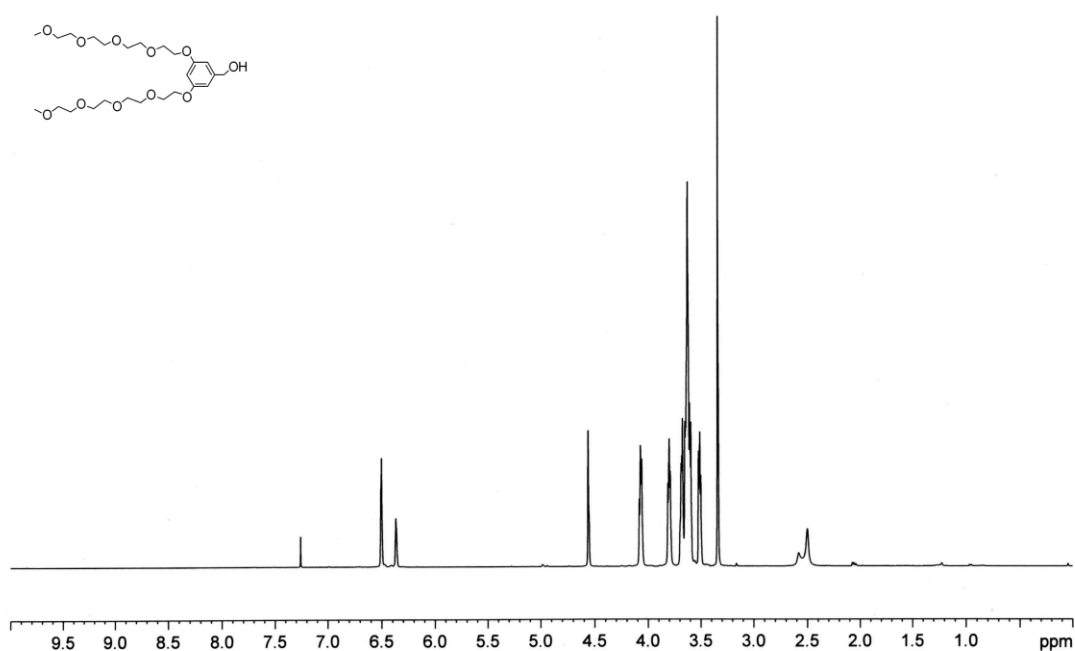

**Figure S1.** <sup>1</sup>H NMR spectrum (400MHz, CDCl<sub>3</sub>) of G1-OH (2)

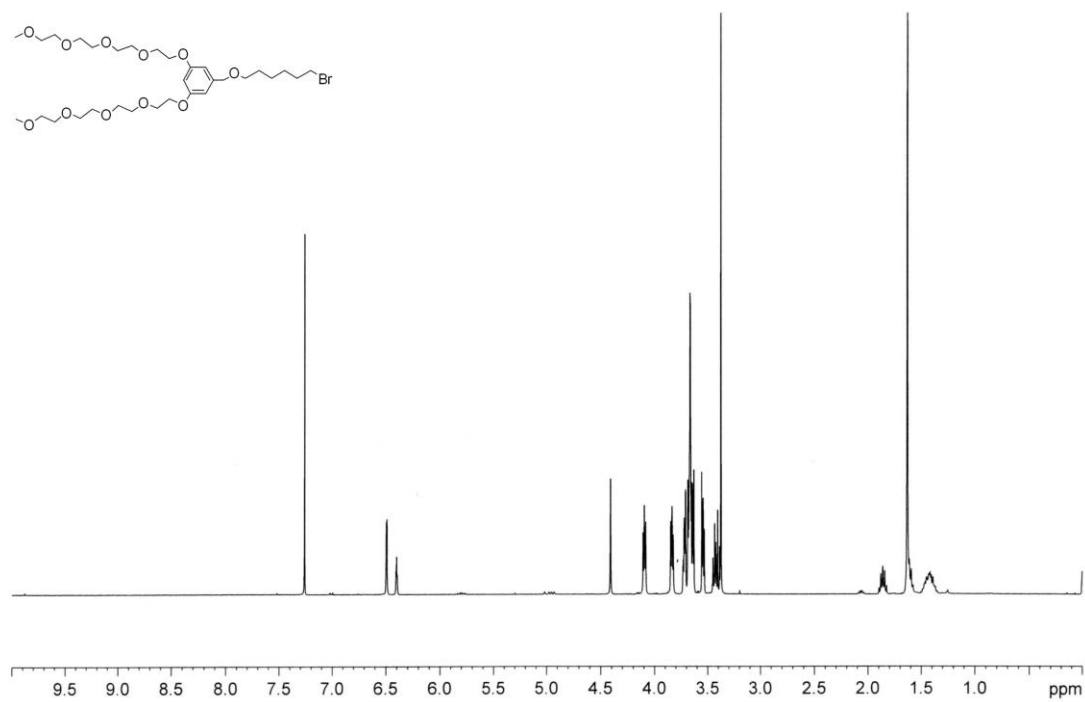

**Figure S2.** <sup>1</sup>H NMR spectrum (400MHz, CDCl<sub>3</sub>) of G1-Br (**3**)

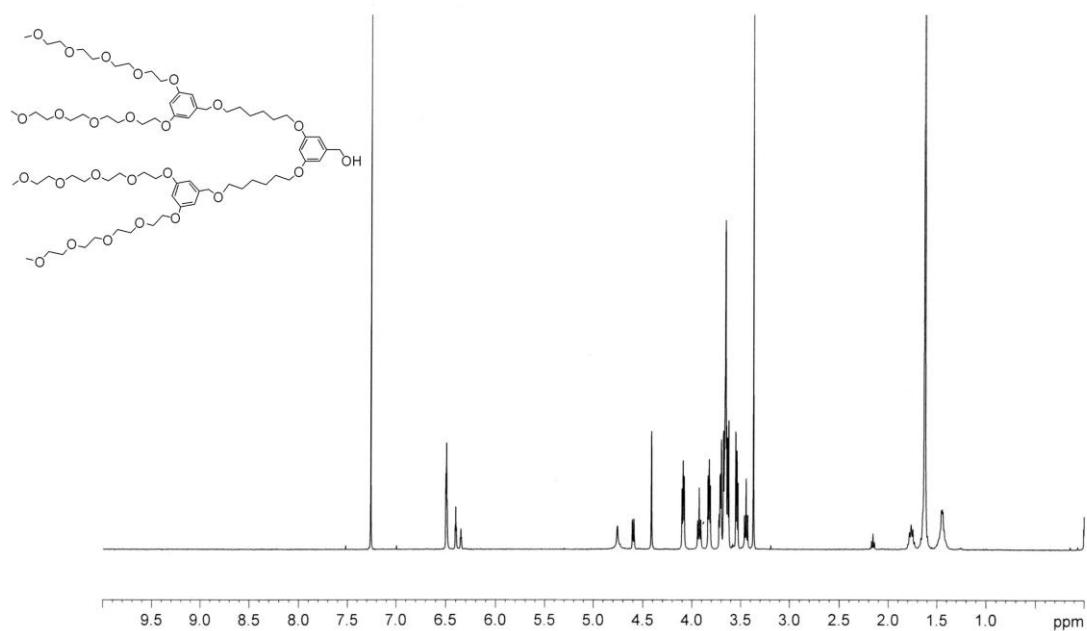

**Figure S3.** <sup>1</sup>H NMR spectrum (400MHz, CDCl<sub>3</sub>) of G2-OH (**4**)

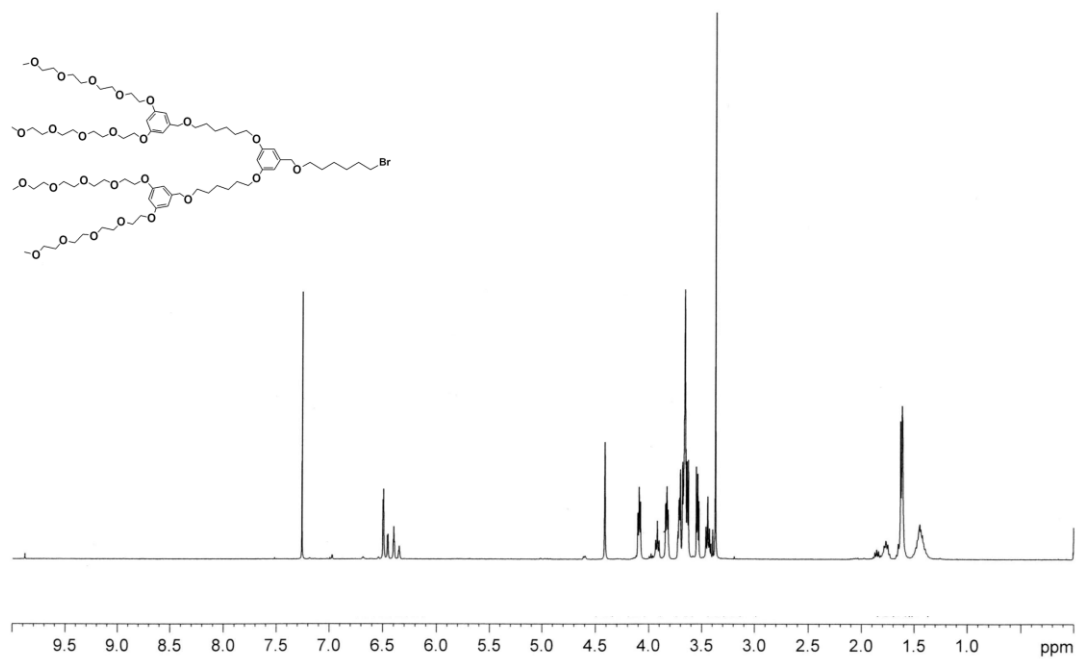

**Figure S4.** <sup>1</sup>H NMR spectrum (400MHz, CDCl<sub>3</sub>) of G2-Br (5)

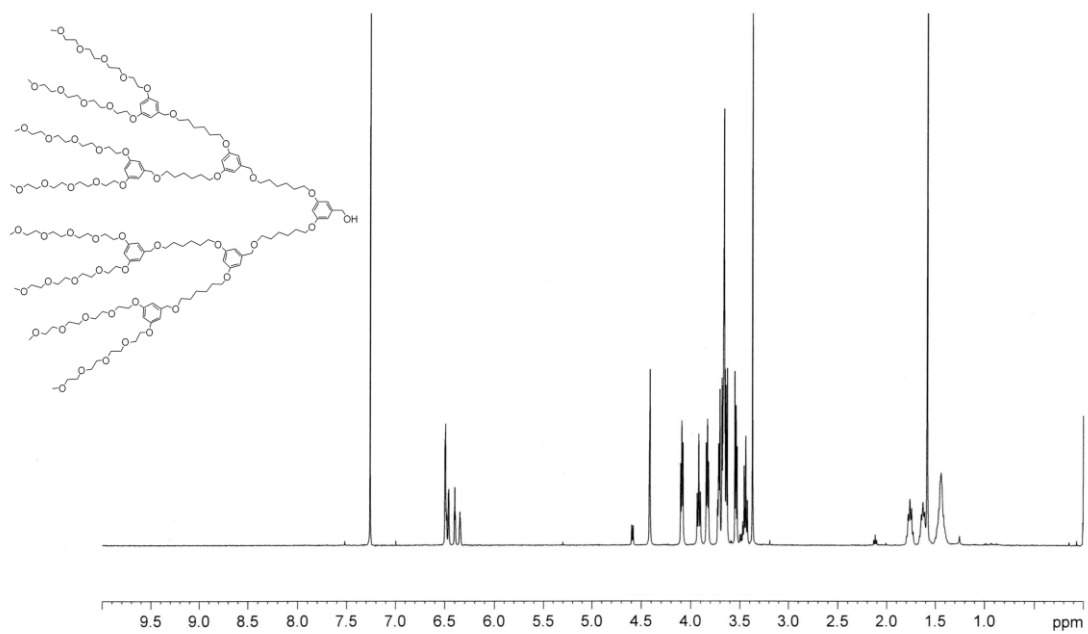

**Figure S5.** <sup>1</sup>H NMR spectrum (400MHz, CDCl<sub>3</sub>) of G3-OH (6)

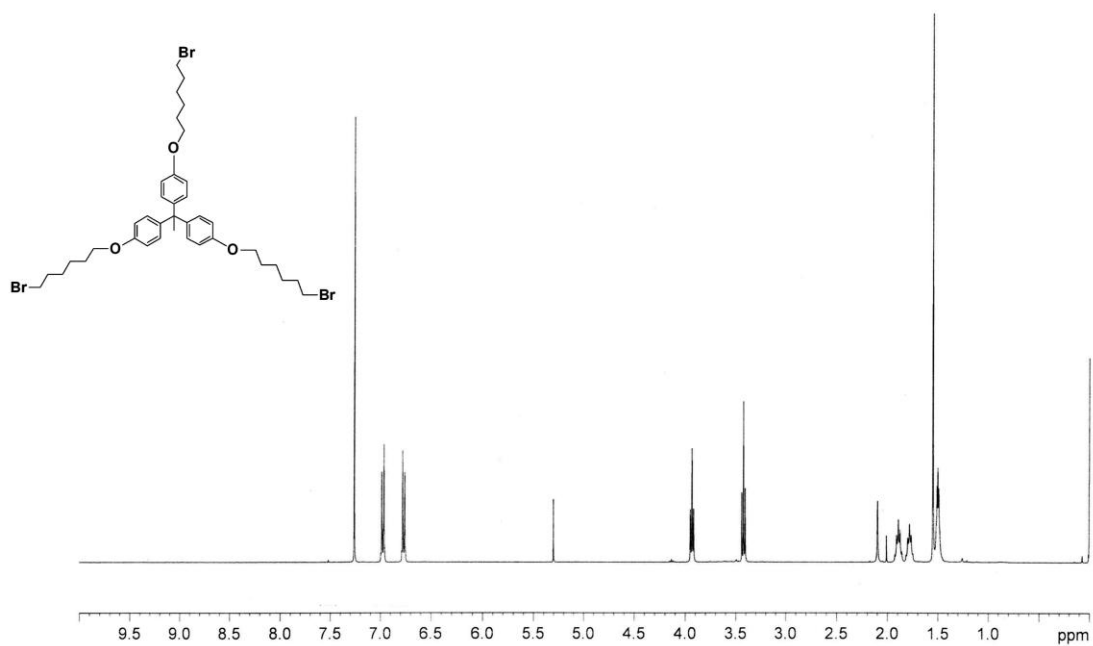

**Figure S6.** <sup>1</sup>H NMR spectrum (400MHz, CDCl<sub>3</sub>) of Core (7)

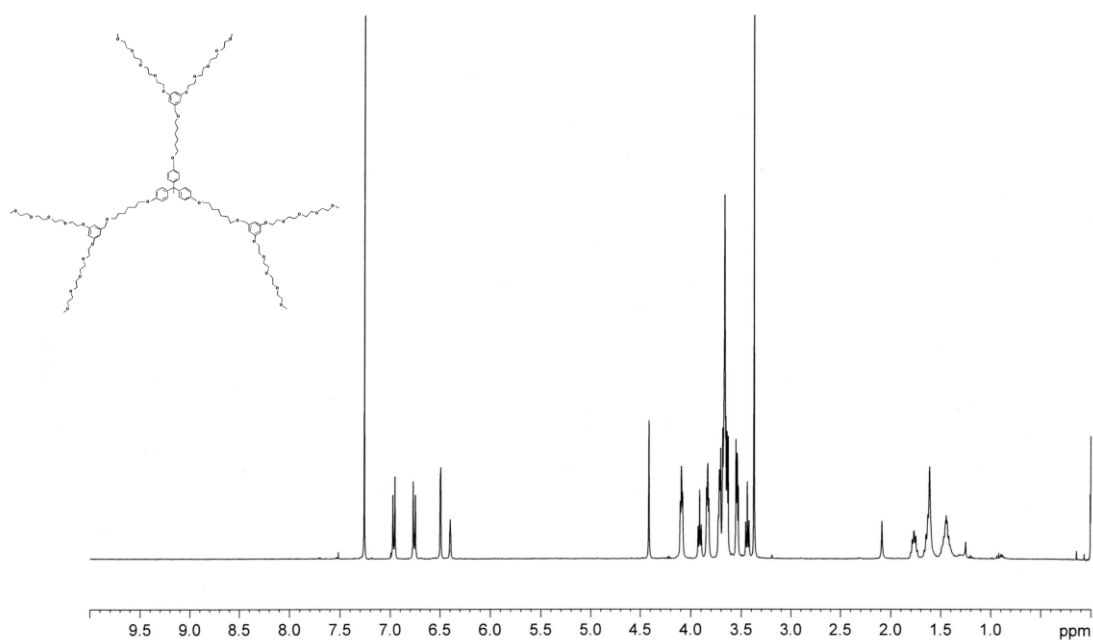

**Figure S7.** <sup>1</sup>H NMR spectrum (400MHz, CDCl<sub>3</sub>) of G1 dendrimer

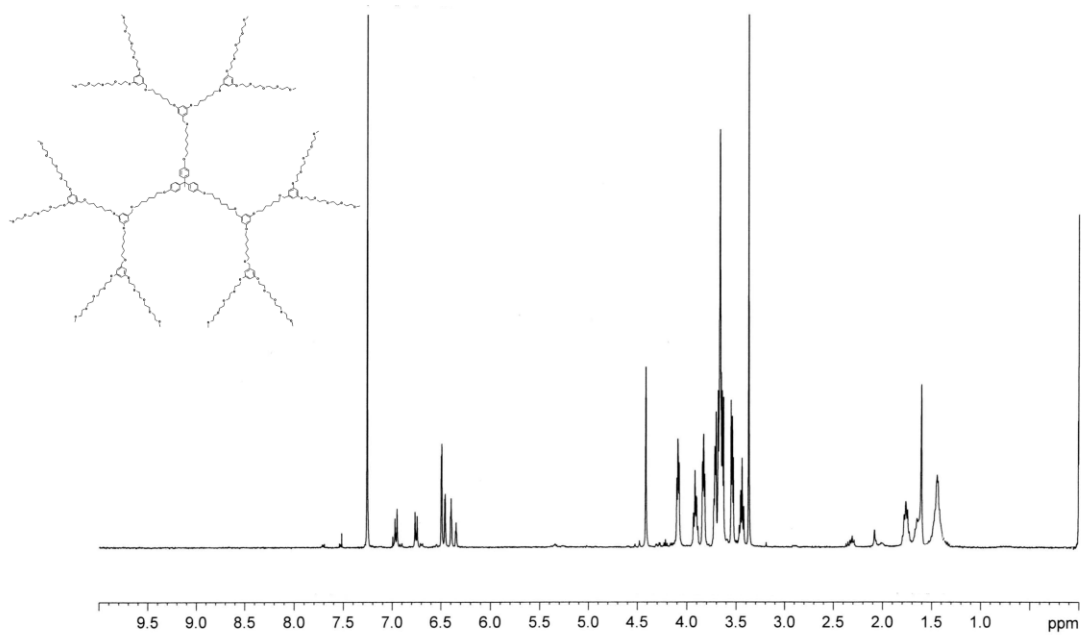

**Figure S8.** <sup>1</sup>H NMR spectrum (400MHz, CDCl<sub>3</sub>) of G2 dendrimer

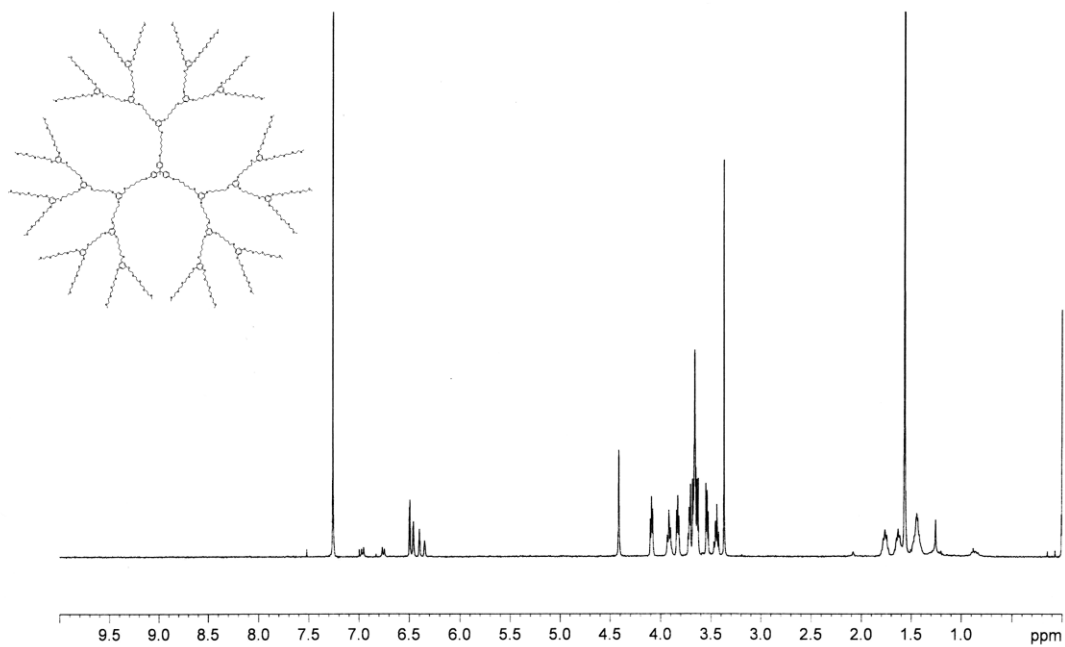

**Figure S9.** <sup>1</sup>H NMR spectrum (400MHz, CDCl<sub>3</sub>) of G3 dendrimer

G1

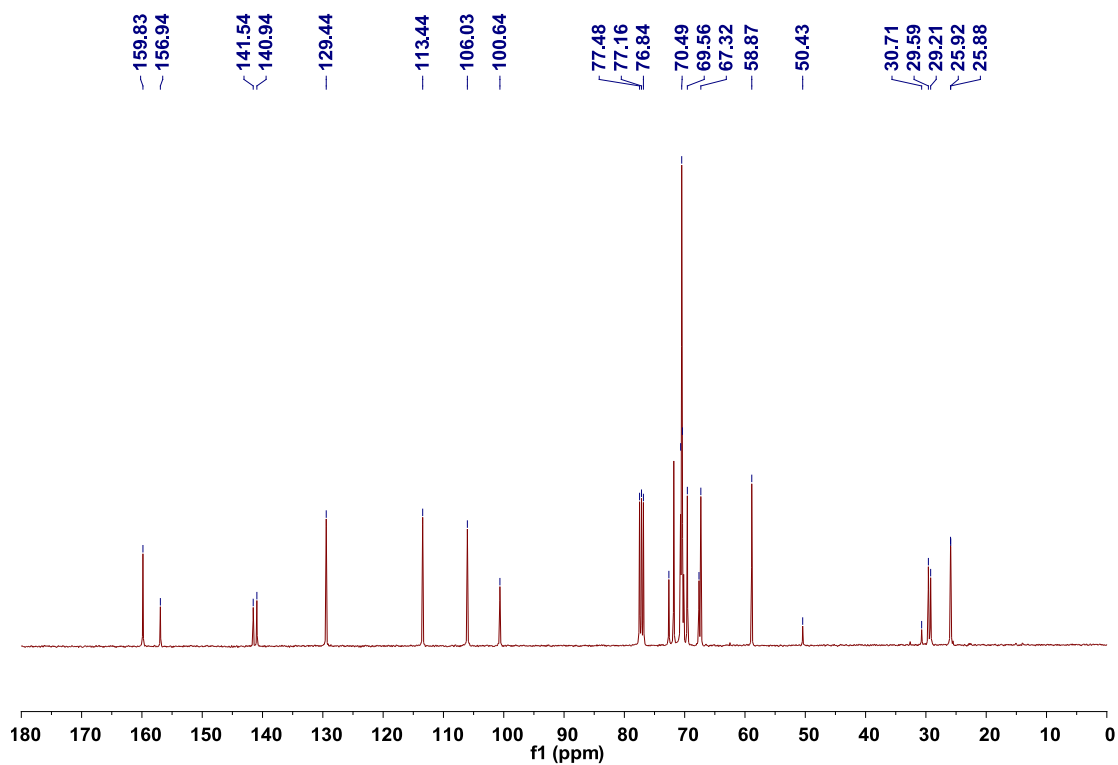

Figure S10. <sup>13</sup>C NMR spectrum (100MHz, CDCl<sub>3</sub>) of G1 dendrimer

G2

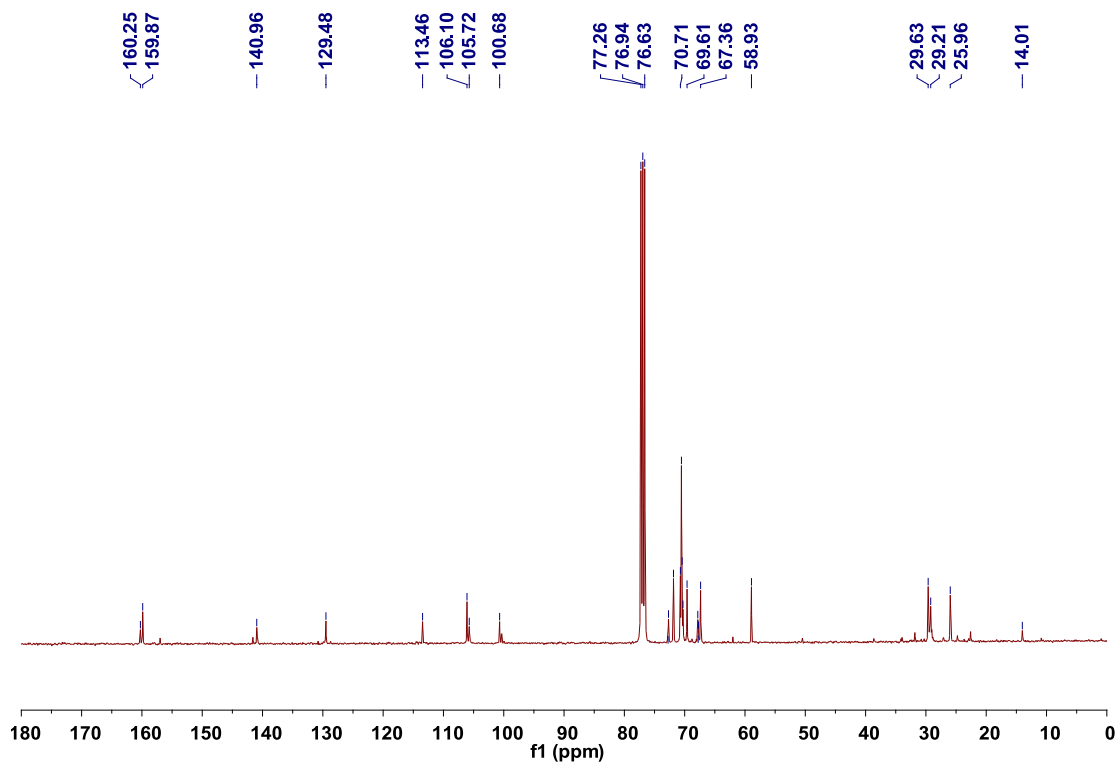

Figure S11. <sup>13</sup>C NMR spectrum (100MHz, CDCl<sub>3</sub>) of G2 dendrimer

G3

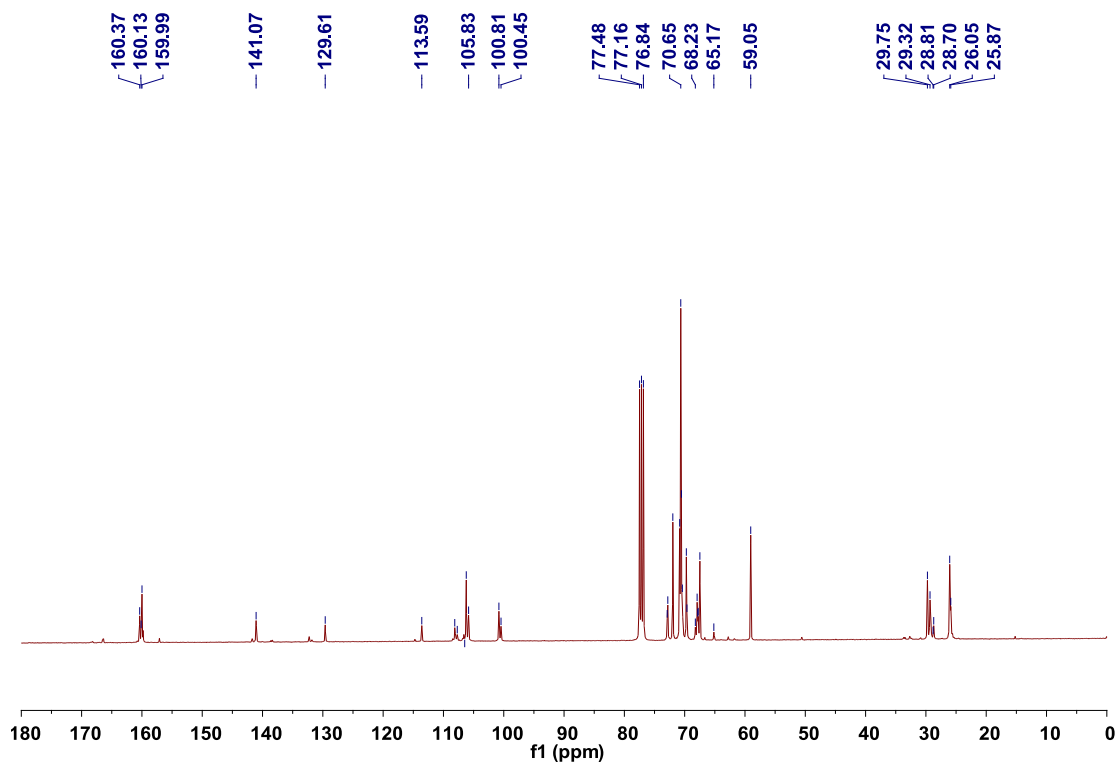

Figure S12.  $^{13}\text{C}$  NMR spectrum (100MHz,  $\text{CDCl}_3$ ) of G3 dendrimer

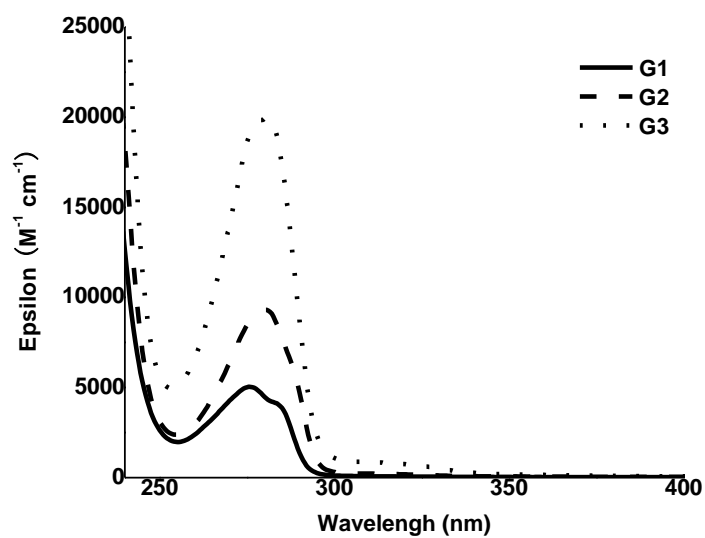

Figure S13. Absorption spectra of G1 to G3 dendrimers in aqueous solution.

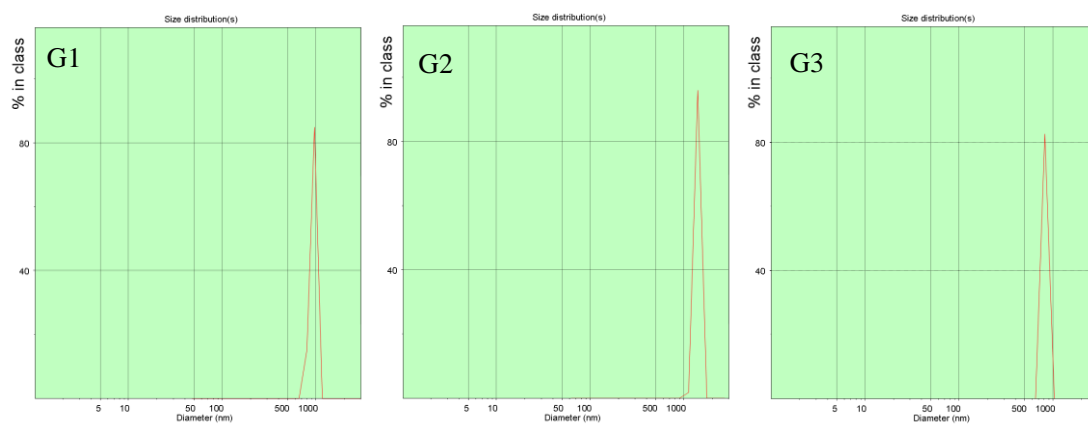

**Figure S14.** DLS size distribution profiles: [G1] = 1.6 mM; [G2] = 0.8 mM; [G3] = 0.4 mM
